# Supplementary material for: Increasing the Efficacy of Seproxetine as an Antidepressant Using Charge–Transfer Complexes
Source: MDPI journal article supplement (doi:10.3390/molecules27103290), 2022-05-20
Supplement: s1 [file s1]

## **Supplementary Data**

### **Increasing the efficacy of seproxetine as an antidepressant using charge-transfer complexes**

Wala F. Alsanie<sup>1,2</sup>, Abdulhakeem S. Alamri<sup>1,2</sup>, Hussain Alyami<sup>3</sup>, Majid Alhomrani<sup>1,2</sup>, Sonam Shakya<sup>4</sup>, Hamza Habeeballah<sup>5</sup>, Heba A. Alkhatabi<sup>6,7,8</sup>, Raed I. Felimban<sup>5,9</sup>, Ahmed S. Alzahrani<sup>2</sup>, Abdulhameed Abdullah Alhabeed<sup>10</sup>, Bassem M. Raafat<sup>11</sup>, Moamen S. Refat<sup>12,\*</sup>, and Ahmed Gaber<sup>2,13,\*</sup>

<sup>1</sup>Department of Clinical Laboratories Sciences, The faculty of Applied Medical Sciences, Taif University, P.O. Box 11099, Taif 21944, Saudi Arabia; w.alsanie@tu.edu.sa (W.F.A.); m.alhomrani@tu.edu.sa (M.A.); a.alamri@tu.edu.sa (A.S.A.); a.s.zahrani@tu.edu.sa (Ah.S.A.)

<sup>2</sup>Centre of Biomedical Sciences Research (CBSR), Deanship of Scientific Research, Taif University, P.O. Box 11099, Taif 21944, Saudi Arabia.

<sup>3</sup>College of Medicine, Taif University, Taif University, P.O. Box 11099, Taif 21944, Saudi Arabia; hmyami@tu.edu.sa (H.A.)

<sup>4</sup>Department of Chemistry, Faculty of Science, Aligarh Muslim University, Aligarh 202002, India; sonamshakya08@gmail.com (S.S.)

<sup>5</sup>Department of Medical Laboratory Technology, Faculty of Applied Medical Sciences in Rabigh, King Abdulaziz University, Jeddah 21589, Saudi Arabia; hhabeeballah@kau.edu.sa (H.H.)

<sup>6</sup>Department of Medical Laboratory Technology, Faculty of Applied Medical Sciences, King Abdulaziz University, Jeddah 21589, Saudi Arabia; halkhattabi@kau.edu.sa (H.A.A.); faraed@kau.edu.sa (R.I.F.)

<sup>7</sup>Center of Excellence in genomic Medicine Research (CEGMR), King Abdulaziz University, Jeddah 21589, Saudi Arabia.

<sup>8</sup>King Fahd Medical Research Centre, Hematology Research Unit, King Abdulaziz University, Jeddah 21589, Saudi Arabia.

<sup>9</sup>Center of Innovation in Personalized Medicine (CIPM), 3D Bioprinting Unit, King Abdulaziz University, Jeddah 21589, Saudi Arabia.

<sup>10</sup>National Centre for mental health promotion, P.O. Box 95459, Riyadh 11525, Saudi Arabia; aalhabeed@ncmh.org.sa (A.A.A.)

<sup>11</sup>Department of Radiological Sciences, College of Applied Medical Sciences, Taif University, P.O. Box 11099, Taif 21944, Saudi Arabia; bassemraafat@tu.edu.sa (B.M.R.)

<sup>12</sup>Department of Chemistry, College of Science, Taif University, P.O. Box 11099, Taif 21944, Saudi Arabia; moamen@tu.edu.sa (M.S.R.)

<sup>13</sup>Department of Biology, College of Science, Taif University, P.O. Box 11099, Taif 21944, Saudi Arabia; a.gaber@tu.edu.sa (A.G.)

\*Correspondence: Correspondence: a.gaber@tu.edu.sa; [moamen@tu.edu.sa](mailto:moamen@tu.edu.sa)

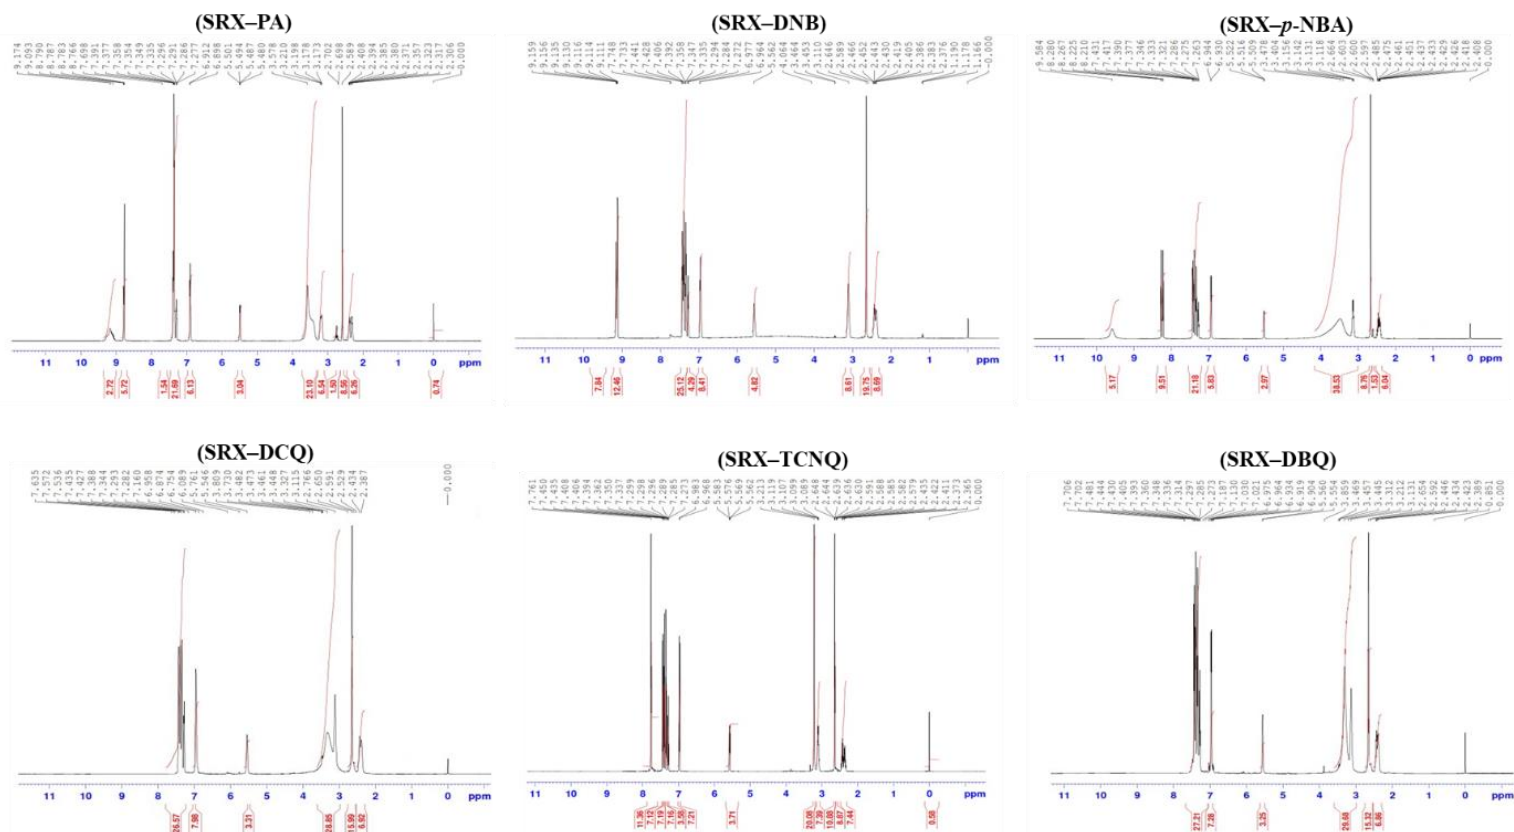

**Figure S1.**  $^1\text{H}$ -NMR spectrum of all six  $\pi$ -acceptors complexes.

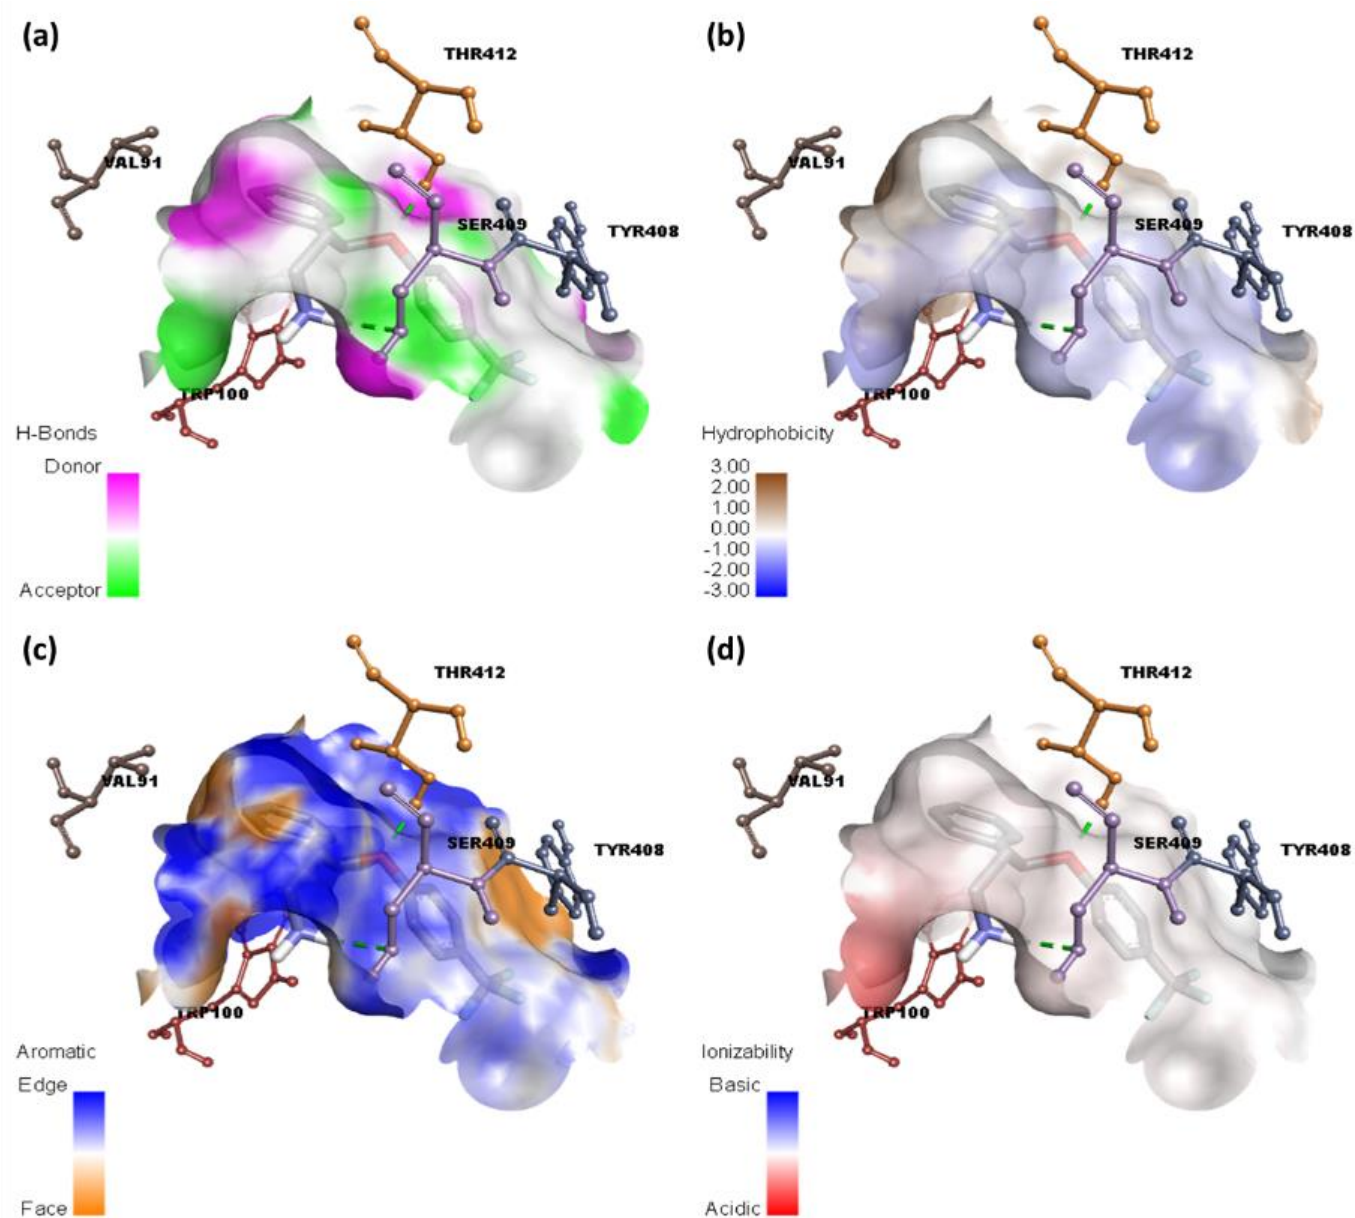

**Figure S2.** Representation of (a) hydrogen binding surface, (b) hydrophobic surface, (c) aromatic surface, and (d) ionizability surface; between dopamine and SRX.
